# Supplementary material for: Interpretation of NO 3 –N 2 O 5 observation via steady state in high-aerosol air mass: the impact of equilibrium coefficient in ambient conditions
Source: Copernicus journal article supplement (doi:10.5194/acp-22-3525-2022), 2022-03-16
Supplement: Supplementary file 1 [file acp-22-3525-2022-supplement.pdf]

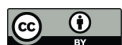

*Supplement of*

## **Interpretation of $\text{NO}_3\text{--N}_2\text{O}_5$ observation via steady state in high-aerosol air mass: the impact of equilibrium coefficient in ambient conditions**

**Xiaorui Chen et al.**

*Correspondence to:* Haichao Wang (wanghch27@mail.sysu.edu.cn) and Keding Lu (k.lu@pku.edu.cn)

The copyright of individual parts of the supplement might differ from the article licence.

|    |                                                                                                                               |
|----|-------------------------------------------------------------------------------------------------------------------------------|
| 1  | <b>Contents</b>                                                                                                               |
| 2  | <i>Supplementary Text:</i>                                                                                                    |
| 3  | Text S1. Ambient case invalid for NO <sub>3</sub> -N <sub>2</sub> O <sub>5</sub> steady state analysis                        |
| 4  | Text S2. Observation datasets from field campaigns 2017PKU and 2018TZ                                                         |
| 5  | Text S3. Characteristic of nighttime NO <sub>3</sub> -N <sub>2</sub> O <sub>5</sub> loss pathway in half-artificial dataset   |
| 6  | Text S4. Parameterization of Keq coefficient in different databases                                                           |
| 7  | Text S5. Sensitivity tests of time to approach steady state                                                                   |
| 8  | Text S6. The impacts of $k_{\text{NO}_3}$ and $k_{\text{N}_2\text{O}_5}$ levels on $\gamma_{\text{ss}}(\text{N}_2\text{O}_5)$ |
| 9  |                                                                                                                               |
| 10 | <i>Supplementary Figures:</i> Figure S1 to Figure S10                                                                         |
| 11 |                                                                                                                               |
| 12 | <i>Supplementary Tables:</i> Table S1 to Table S4                                                                             |
| 13 |                                                                                                                               |
| 14 | <i>References</i>                                                                                                             |
| 15 |                                                                                                                               |
| 16 |                                                                                                                               |
| 17 |                                                                                                                               |

18 **S1. Ambient case invalid for NO<sub>3</sub>-N<sub>2</sub>O<sub>5</sub> steady state analysis**

19 Take two typical cases in winter and summer respectively for example to illustrate the  
20 conditions under which steady state analysis is invalid for interpreting NO<sub>3</sub>-N<sub>2</sub>O<sub>5</sub>  
21 observation and deriving  $\gamma(\text{N}_2\text{O}_5)$ . Over the period of wintertime case shown in Figure S1,  
22 the NO<sub>x</sub> and Sa concentration were low, indicating a clean episode. The  $\gamma(\text{N}_2\text{O}_5)$  and  $k\text{NO}_3$   
23 can be determined from the intercept and slope respectively by linear fit based on steady  
24 state equation Eq. (5). The details and derivation of this approach are provided in  
25 introduction and method section. Albeit the correlation coefficient for deriving  $\gamma(\text{N}_2\text{O}_5)$  by  
26 steady state approximation appears to be high, an unreasonably negative  $k\text{NO}_3$  value derived  
27 during this analysis period (Figure S1d) indicates that the steady state in this case still  
28 requires much longer induction time due to low strength of NO<sub>3</sub>-N<sub>2</sub>O<sub>5</sub> sink. In summertime  
29 case, although large sink rate contributed to fast approach of steady state, frequent injection  
30 of NO<sub>x</sub> emission could significantly modify the air mass condition. The time for mixing and  
31 reacting was still less than enough as emissions deviates the air mass from steady state  
32 (Figure S1e-S1g), leading to weak correlation factors (Figure S1h).

33

## 34 **S2. Observation datasets from field campaigns 2017PKU and 2018TZ**

35 The datasets used for analysis in this study were obtained from two field campaigns with  
36 different ambient conditions. The PKU2017 winter campaign took place from mid-November  
37 to late-December 2017 in the campus of Peking University, which is at urban area of Beijing,  
38 China. And the other one TZ2018 summer campaign took place from late-May to mid-June  
39 2018 at a suburban supersite, Taizhou, China. More specific information about these two  
40 campaigns can be referred to our previous studies (Ma et al., 2019; Wang et al., 2020), while  
41 only basic background of site location and analysis-relevant instrumentation are provided  
42 below.

43 During the PKU2017 campaign, all instruments were applied on the roof of building in  
44 the campus of Peking University, which was about 100 m west to the major roads with strong  
45 influence of vehicle emissions. Each sampling inlet was distributed at least 20 m above the  
46 ground. The strong northerly winds with dry and clean air mass during the winter would  
47 periodically transport to this site, bring in fresh O<sub>3</sub> at night. The TZ2018 site is surrounded by  
48 agricultural land and fishponds, resulted in strong influence of biogenic emissions and  
49 occasional biomass burning. Each sampling inlet was distributed about 5 m above the ground.  
50 It should be noted that low concentration level of NO was frequently observed at this site due  
51 to a major highway within 0.5 km.

52 Same instrumentation was implemented in these two campaigns, and the related  
53 information are given in Table S1. We adjusted the nighttime NO concentration near the  
54 detection limit to zero during the periods with O<sub>3</sub> concentration higher than 25 ppbv, as the  
55 lifetime of NO would be extremely short at night under this condition and the NO  
56 measurement at the low level usually has large uncertainty.

57

### 58 S3. Characteristic of nighttime NO<sub>3</sub>-N<sub>2</sub>O<sub>5</sub> loss pathway in half-artificial dataset

59 The validity of NO<sub>3</sub>-N<sub>2</sub>O<sub>5</sub> steady state depends on their atmospheric lifetime, in other  
60 words their loss rate constants (Brown et al., 2003). In different seasons or areas, variations of  
61 emission, temperature, and other relevant factors can sufficiently change the sink strength of  
62 ambient NO<sub>3</sub> and N<sub>2</sub>O<sub>5</sub> and thus relative occupations of these pathways. As half-artificial  
63 datasets (detailed in Methods) indicated, the average nighttime loss rate of NO<sub>3</sub> and N<sub>2</sub>O<sub>5</sub> at  
64 PKU site in winter were 41 pptv h<sup>-1</sup> and 195 pptv h<sup>-1</sup>, whereas much higher rates were obtained  
65 at TZ2018 campaign with 451 pptv h<sup>-1</sup> for NO<sub>3</sub> and 390 pptv h<sup>-1</sup> for N<sub>2</sub>O<sub>5</sub>. Distinguished from  
66 a dominant sink rate of N<sub>2</sub>O<sub>5</sub> in winter, total sink rate attribution shifted to NO<sub>3</sub> side in summer  
67 with significant larger sink strength than that in winter. The average proportions of NO<sub>3</sub> and  
68 N<sub>2</sub>O<sub>5</sub> removal in each night is shown in Figure S2, where the nights with missing data  
69 represents that there is less than 15% valid data. Under the condition of approximate steady  
70 state, the sink flux contributed through N<sub>2</sub>O<sub>5</sub> reaches up to 55~95% in wintertime campaign  
71 2017PKU with an average higher than 80%, whilst it turns out to be less than 50%, even 5%,  
72 in 2018TZ summer campaign. Besides the different emission compositions at these two sites  
73 leading to significant distinction of removal attribution (strong biogenic emission at TZ site  
74 and high anthropogenic emission at PKU site), high temperature during summer facilitates the  
75 equilibrium in reactions R1 shifting to NO<sub>3</sub>, further increasing the sink flux of NO<sub>3</sub>. The  
76 attribution of removal pathways among NO<sub>3</sub> and N<sub>2</sub>O<sub>5</sub> directly determines the weights of two  
77 terms on the right side of steady state expressions Eq. (4) and Eq. (5), contributing to assessing  
78 the impacts of several variables on steady state fitting among different reactivity conditions.

79 Taking two typical cases from these two datasets for example, the N<sub>2</sub>O<sub>5</sub> lifetime was about  
80 20 minutes in winter (Figure S3(a)), while was largely reduced to 100 seconds for summertime  
81 case (Figure S3(c)). The steady state lifetime of N<sub>2</sub>O<sub>5</sub> ( $\tau_{ss}(\text{N}_2\text{O}_5) = \frac{[\text{N}_2\text{O}_5]}{k_{\text{R1}}[\text{NO}_2][\text{O}_3]}$ ) and  
82 calculated lifetime of N<sub>2</sub>O<sub>5</sub> ( $\tau_{calc}(\text{N}_2\text{O}_5) = (k_{\text{N}_2\text{O}_5} + \frac{k_{\text{NO}_3}}{K_{eq}[\text{NO}_2]})^{-1}$ ) were used for determine  
83 whether the situation had satisfied steady state (see details in methods section). Significantly  
84 different atmospheric lifetime for these two cases was majorly resulted from varying uptake

85 removal pathways instead of  $k\text{NO}_3$  from gas-phase reactions. Higher humidity at TZ site  
86 during nights facilitated hygroscopic growth of particles, the Sa concentration of which usually  
87 increased up to thousands of  $\mu\text{m}^2 \text{cm}^{-3}$  promoting the uptake reactions of  $\text{NO}_3$  and  $\text{N}_2\text{O}_5$ ,  
88 whereas Sa in the PKU site case become lower than  $500 \mu\text{m}^2 \text{cm}^{-3}$  under the impact of clean  
89 and dry air mass. The steady state lifetime denoted by blue dash line in Figure S3(a)&(c),  
90 shows good agreement with atmospheric lifetime in both of cases, indicating that the  $\text{NO}_3$ -  
91  $\text{N}_2\text{O}_5$  chemical system simulated by steady state model is validated to be approximate steady  
92 state (deviation  $<5\%$ ). However, even in these cases, the derived uptake coefficient of  $\text{N}_2\text{O}_5$ ,  
93  $\gamma_{\text{ss}}(\text{N}_2\text{O}_5)$ , through steady state fitting (Figure S3(b)&(d)) still have a significant bias ( $>20\%$ )  
94 from the setting values 0.02. Furthermore, we found that unexpected difference between  
95  $\gamma_{\text{ss}}(\text{N}_2\text{O}_5)$  fitting results and  $\gamma(\text{N}_2\text{O}_5)$  setting values is common for all selected steady state  
96 periods in datasets. Since the influence of covariance of Sa and  $K_{\text{eq}} \times [\text{NO}_2]$  has been avoided  
97 by applying Eq. (5) (Brown et al., 2009), the bias of  $\gamma_{\text{ss}}(\text{N}_2\text{O}_5)$  presented in the above fitting  
98 calculation could be produced by interaction between equilibrium and steady state, variation  
99 of relevant parameters in the fitting equations (such as  $k\text{NO}_3$ ,  $k\text{N}_2\text{O}_5$ , etc), which are discussed  
100 in the main text.

101

#### 102 S4. Parameterization of $K_{eq}$ coefficient in different databases

103  $K_{eq}$  of  $\text{NO}_3\text{-N}_2\text{O}_5$  system is a temperature dependent parameter, which has been  
104 extensively quantified in the laboratory (Pritchard, 1994). According to simultaneous  
105 measurements of  $\text{N}_2\text{O}_5$ ,  $\text{NO}_3$  and  $\text{NO}_2$  concentration in a reaction chamber, the  $K_{eq}$  can be  
106 directly calculated (Cantrell et al., 1988;Graham and Johnston, 1978;Osthoff et al., 2007),  
107 while the measurements of  $k_{R1a}$  and  $k_{R1b}$  or other accompanied parameters provides indirect  
108 ways to quantify  $K_{eq}$  (Cantrell et al., 1993;Kircher et al., 1984;Smith and Ravishankara, 1985).  
109 However, distinct differences arise from these  $K_{eq}$  results, which might be ascribed to the  
110 calibration uncertainty of absorption cross sections of  $\text{NO}_3$  and  $\text{NO}_2$  molecule (Osthoff et al.,  
111 2007). Jet Propulsion Laboratory (JPL) database provides an empirical formula, similar with  
112 Arrhenius formula, to calculate  $K_{eq}$  in a simple way:

$$113 K_{eq}(JPL) = A \times \exp(B/T), \quad (S1)$$

114 Here T denotes ambient temperature, and coefficients A and B are empirical parameter derived  
115 from laboratory works. Nevertheless, only parameterizations of  $k_{R1a}$  and  $k_{R1b}$  based on fall-off  
116 curve are described in IUPAC database and most of chemical mechanisms, without a direct  
117 formula to estimate  $K_{eq}$  value. To our best knowledge, only one previous study compared two  
118 of these parameterizations in terms of temperature dependence (Chang et al., 2011).

119 Here, a set of uniform formulas are applied to describing  $k_{R1a}$  and  $k_{R1b}$ , capable of  
120 reproducing the preferred values given by several popular atmospheric chemistry mechanisms  
121 (Mozart, CB05, Saprc07, RACM2 and kinetic databases JPL2015 as well as IUPAC2017) and  
122 finally calculating  $K_{eq}$ . As shown in Eq. (S2) and Eq. (S3):

$$123 k_{R1a}([M], T) = \left( \frac{k_o(T)[M]}{1 + \frac{k_o(T)[M]}{k_{\infty}(T)}} \right) \times F \left( \left\{ 1 + \left[ \frac{\log_{10} \left( \frac{k_o(T)[M]}{k_{\infty}(T)} \right)}{g} \right]^2 \right\}^{-1} \right), \quad (S2)$$

$$k_{R1b}([M], T) = \left( \frac{k_o(T)[M]e^{\frac{-B1}{T}}}{A} \right) \times F \left( \left[ 1 + \frac{\log_{10} \left( \frac{k_o(T)[M]e^{\frac{-B1}{T}}}{k_{\infty}(T)e^{\frac{-B2}{T}}} \right)}{g} \right]^2 \right)^{-1}, \quad (S3)$$

125 The parameter [M] represent molecular density in ambient air.  $k_o(T)$  and  $k_{\infty}(T)$  are rate  
 126 coefficients of third-body reactions under low and high pressure respectively, which over  
 127 different temperatures can be extrapolated by Eq. (S4) and Eq. (S5) based on 300 K  
 128 measurement or simulation results:

$$129 \quad k_o(T) = k_o^{300} \left( \frac{T}{300} \right)^{-n}, \quad (S4)$$

$$130 \quad k_{\infty}(T) = k_{\infty}^{300} \left( \frac{T}{300} \right)^{-m}, \quad (S5)$$

131 All parameters in the above formulas are summarized in Table S3 and Table S4, which  
 132 can be applied to calculating Keq coefficient via  $k_{R1a}/k_{R1b}$ . We found that there are significant  
 133 differences among the parameters from these chemical mechanisms and databases, with a  
 134 maximum discrepancy of 63% propagating to Keq at 298 K.

135



## 136 S5. Sensitivity tests of time to approach steady state

137 In Figure S8 and Figure S9, a series of sensitivity test provide an assessment of the time  
138 a valid steady state needs under several conditions. The most sensitive variables to the time to  
139 reach a valid steady state are  $k\text{N}_2\text{O}_5$ ,  $k\text{NO}_3$  and T, the enhancement of which reduces the  
140 induction time, facilitating the approach to valid steady state of  $\text{NO}_3\text{-N}_2\text{O}_5$  system. The time  
141 for a simulation of a particular case, starting from initialized conditions to meet the steady  
142 state criterion (detailed in the methods section), is defined as the time to reach a valid steady  
143 state. In the case of increasing  $k\text{N}_2\text{O}_5$  and  $k\text{NO}_3$ , the fast approaching to steady state is accounted  
144 by lower concentration of  $\text{NO}_3$  and  $\text{N}_2\text{O}_5$  when the steady state is valid. By comparing the  
145 sensitivity tests based on summertime (Figure S8(a)) and wintertime (Figure S8(b)) conditions,  
146 the impacts of  $k\text{N}_2\text{O}_5$  on approaching steady state is found to be more efficient than that of  
147  $k\text{NO}_3$  in winter, while both contribute similarly in summer.

148 The different sensitivities to their reactivity in different seasons could be determined by  
149 the weights of loss pathways (Text S3). During the winter, such as the condition of PKU2017,  
150 the  $\text{N}_2\text{O}_5$  usually accounted by over 80% of the overall loss frequency of  $\text{NO}_3\text{-N}_2\text{O}_5$  system,  
151 leading to high sensitivity to  $k\text{N}_2\text{O}_5$ , while comparable loss frequency was occupied by both  
152 of  $\text{NO}_3$  and  $\text{N}_2\text{O}_5$  during the summer. As for the temperature, lower temperature shifts the  
153 equilibrium in R1 to  $\text{N}_2\text{O}_5$  side, which delay the time for developing equilibrium. By contrast,  
154 enhanced loss through  $\text{NO}_3$  with higher ambient temperature decreases the influence of  
155 equilibrium, boosting the approach to steady state. Moreover, Figure S9 shows relatively weak  
156 sensitivity of  $\text{NO}_2$  and  $\text{O}_3$  concentration to steady state approach. While changing  $\text{O}_3$   
157 concentration barely contribute to promote a valid steady state in the scenario of this analysis,  
158 the  $\text{NO}_2$  concentration shows a positive sensitivity in some cases. Like the ambient  
159 temperature, changing  $\text{NO}_2$  concentration could shift the ratio of  $\text{N}_2\text{O}_5/\text{NO}_3$  when steady state  
160 is valid and thus the time it requires. Especially under the condition of low ratio of  $\text{NO}_2$  to  $\text{O}_3$ ,  
161 like that in TZ2018, the enhancement of  $\text{NO}_2$  concentration shift  $\text{NO}_3$  to  $\text{N}_2\text{O}_5$  production and  
162 amplify the influence of equilibrium reactions. Instead, with a sufficiently high ratio of  $\text{NO}_2/\text{O}_3$ ,  
163 the loss associated with  $\text{NO}_3\text{-N}_2\text{O}_5$  system has been already dominated by  $\text{N}_2\text{O}_5$  removal,

164 eliminating the influence of NO<sub>2</sub> increase on delaying steady state. Previous research has also  
165 found similar trends of time to develop steady state according to simple scenarios simulated  
166 by box model (Brown et al., 2003).

167

168 **S6. The impacts of  $k\text{NO}_3$  and  $k\text{N}_2\text{O}_5$  levels on  $\gamma_{\text{ss}}(\text{N}_2\text{O}_5)$**

169 In order to demonstrate the impacts of  $k\text{NO}_3$  level on deriving  $\gamma_{\text{ss}}(\text{N}_2\text{O}_5)$ , another three  
170 half artificial data set are formulated through steady state model also based on the same  
171 observational constraints with  $k\text{NO}_3$  levels increased to 3 times (Mod1), 6 times (Mod2) and  
172 10 times (Mod3) respectively, while other parameters remained unchanged. Similarly, the  
173 steady state fitting is used to obtain  $\gamma_{\text{ss}}(\text{N}_2\text{O}_5)$  for each 2-hour time-period as Mod0. The mean  
174 discrepancy from complete steady state of these time periods and the median deviation of  
175 derived  $\gamma_{\text{ss}}(\text{N}_2\text{O}_5)$  from pre-set  $\gamma(\text{N}_2\text{O}_5)$  are shown as solid circles and triangles in Figure S9.  
176 With the enhancement of  $k\text{NO}_3$  constraints,  $\gamma_{\text{ss}}(\text{N}_2\text{O}_5)$  deviation from true value increase  
177 dramatically, though the  $\text{NO}_3\text{-N}_2\text{O}_5$  system behave generally closer to steady state. A larger  
178 deviation of  $\gamma_{\text{ss}}(\text{N}_2\text{O}_5)$  will be yielded from linear fit at a higher  $k\text{NO}_3$  level, while the relative  
179 varieties of  $k\text{NO}_3$  stay the same. It indicates that the region with strong biogenic emissions is  
180 not suited to steady state fitting, such as TZ site, neither are the time periods with NO injection  
181 due to the resulted high reactivity and fast variation. Therefore, air mass with medium to low  
182 level of  $k\text{NO}_3$  is required to produce accurate  $\gamma_{\text{ss}}(\text{N}_2\text{O}_5)$  when applying steady state to analysis,  
183 like data sets of airborne or residual measurements (Brown et al., 2009; Brown et al.,  
184 2006; Morgan et al., 2015).

185 Similarly, the influence of different levels of  $k\text{N}_2\text{O}_5$  is also explored by adjusting the pre-  
186 set  $\gamma(\text{N}_2\text{O}_5)$  or the Sa concentration constraint in the steady state model, as presented in the  
187 Figure S10(c)&(d). With the enhancement of  $k\text{N}_2\text{O}_5$  level up to 5 times (Mod4), 12.5 times  
188 (Mod5) and 25 times (Mod6) of that in Mod0, the steady state approach can provide more  
189 reliable results of  $\gamma_{\text{ss}}(\text{N}_2\text{O}_5)$ , especially in the summer data set. This is because a large  $k\text{N}_2\text{O}_5$   
190 level contributes to approaching steady state, which instinctively attenuates the deviation of  
191 fitting results produced by the small difference between both sides of Eq. (5).

192

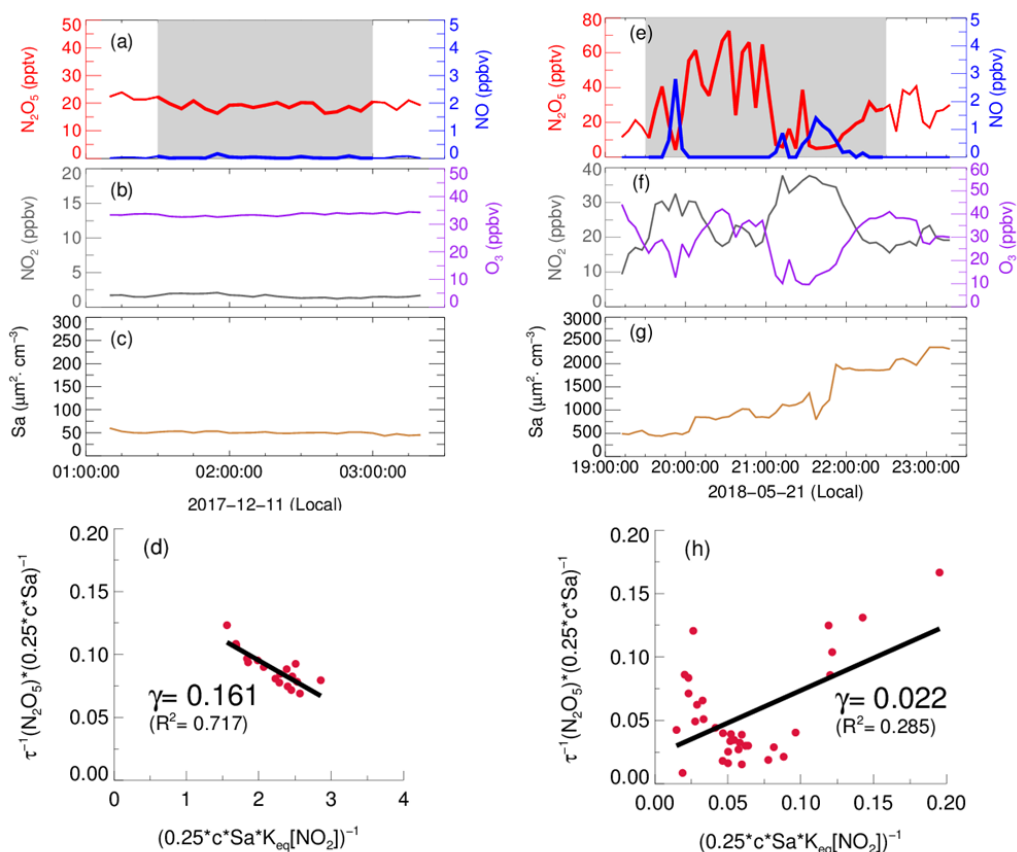

193

194 **Figure S1.** Exemplary steady state fit and the variations of relevant parameters in ambient conditions of  
 195 (a)&(b)&(c)&(d) PKU site and (e)&(f)&(g)&(h) TZ site. The red dots in (d)&(h) represent the correlation plot  
 196 between  $(0.25cS_a\tau_{ss}(N_2O_5))^{-1}$  and  $(0.25cS_aK_{eq}[NO_2])^{-1}$  used for deriving  $\gamma(N_2O_5)$  and  $kNO_3$  as illustrated  
 197 in the method. The text on the plot gives the best fit results of  $\gamma(N_2O_5)$  and correlation coefficient.

198

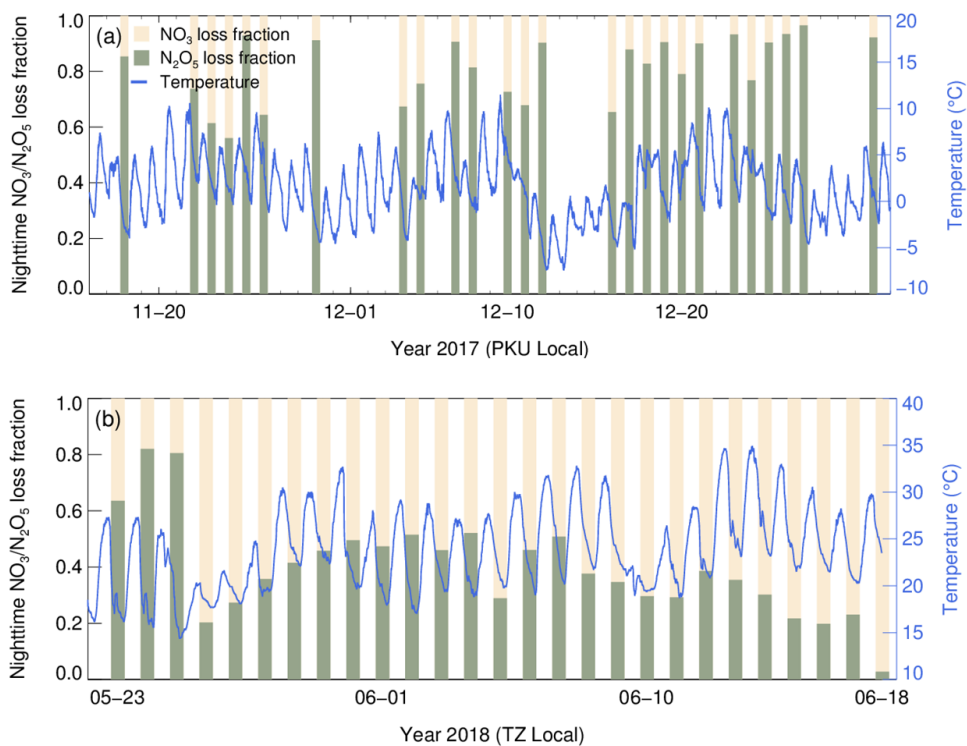

199  
 200 **Figure S2.** Timeseries of each night ( $SZA > 90^\circ$ ) mean  $\text{NO}_3/\text{N}_2\text{O}_5$  loss pathways fractions calculated from steady  
 201 state model and ambient temperature in (a) PKU2017 winter campaign and (b) TZ2018 summer campaign.

202

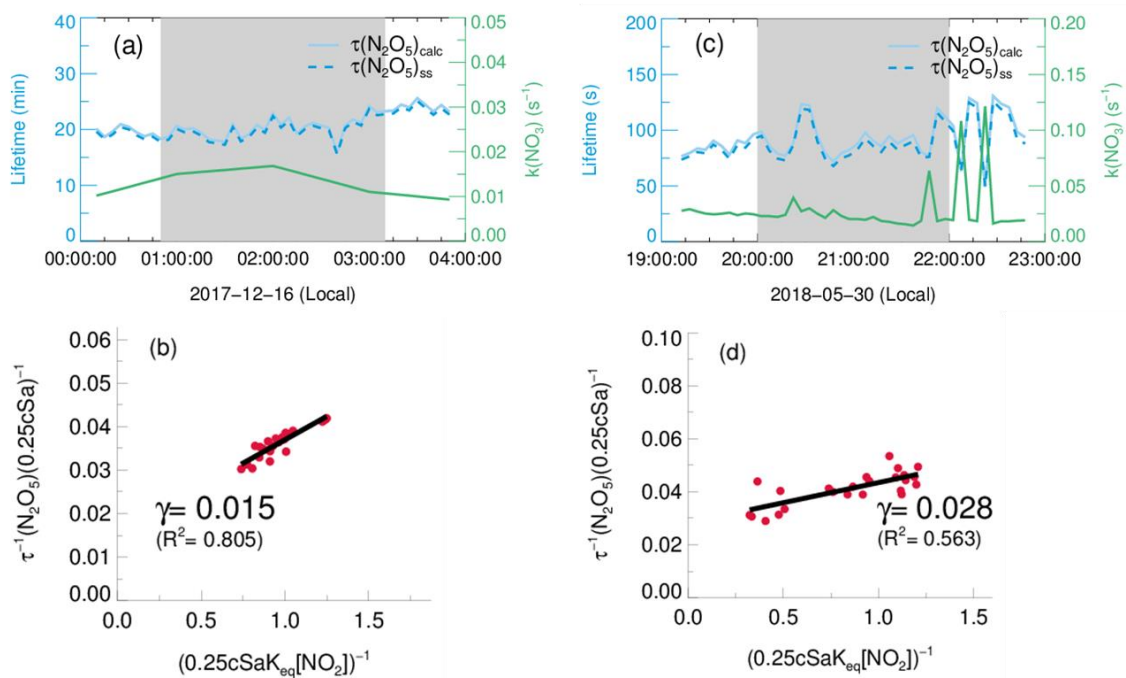

203  
 204 **Figure S3.** Example analysis of  $N_2O_5$  lifetime and  $\gamma_{ss}(N_2O_5)$  derivation through steady state fitting for (a)&(b)  
 205 PKU2017 case in winter and (c)&(d) TZ2018 case in summer. The steady state lifetime and calculated  
 206 atmospheric lifetime are shown as blue dash line and full line respectively. The green line is lumped  $NO_3$  loss  
 207 frequency. The red dots in (b)&(d) represent data points in the shadow area, used for steady state fit (black line)  
 208 by the plot of  $(0.25cS_a\tau_{ss}(N_2O_5))^{-1}$  against  $(0.25cS_aK_{eq}[NO_2])^{-1}$ . The text on the plot gives the best fit  
 209 results of  $\gamma_{ss}(N_2O_5)$  and correlation coefficient.

210

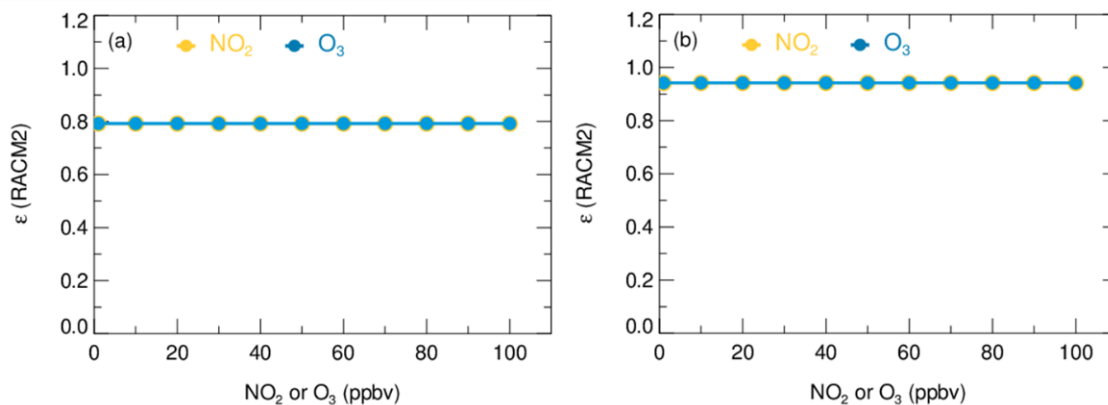

211  
 212 **Figure S4.** Sensitivity plot of  $\text{NO}_2$  and  $\text{O}_3$  concentration against coefficient  $\epsilon$  calculated based on rate constants  
 213 from RACM2. (a) Initial model constraint is according to winter condition of PKU2017; (b) Initial model  
 214 constraint is according to summer condition of TZ2018.

215

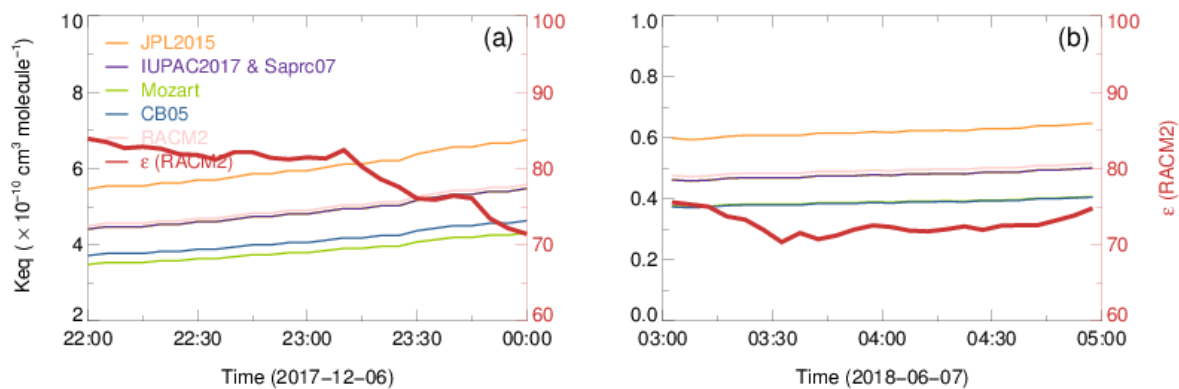

216

217

218

219

220

221

**Figure S5.** Exemplary comparison of  $K_{eq}$  parameterization in (a) 2017-12-06 of PKU2017 dataset and (b) 2018-06-07 of TZ2018 dataset, using parameters from JPL2015 (orange), IUPAC2017&Saprc07 (purple), Mozart (green), CB05 (blue) and RACM2 (pink). It should be noted that the databases of Saprc07 and IUPAC2017 have the exactly same parameters,  $K_{eq}$  derived from which are thus both denoted as purple line. The  $\epsilon$  value calculated based on RACM2 is shown as red line.



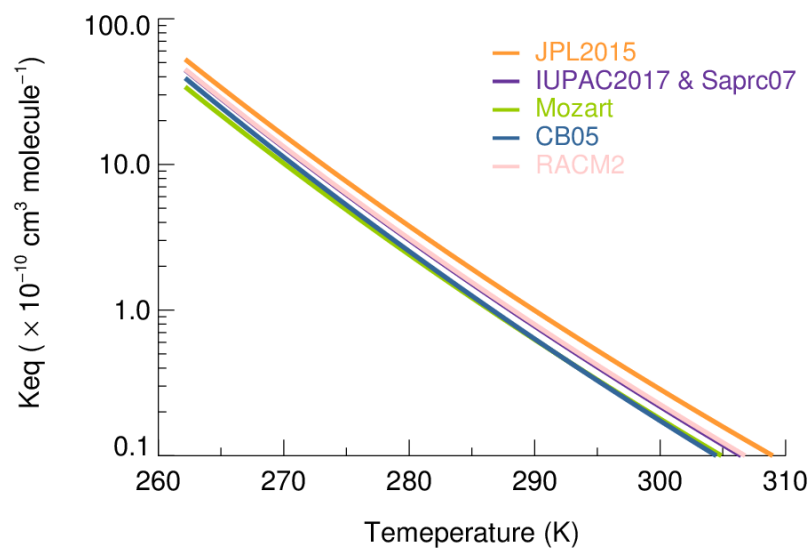

222

223

**Figure S6.** The dependence of different  $K_{eq}$  parameterizations on temperature.

224

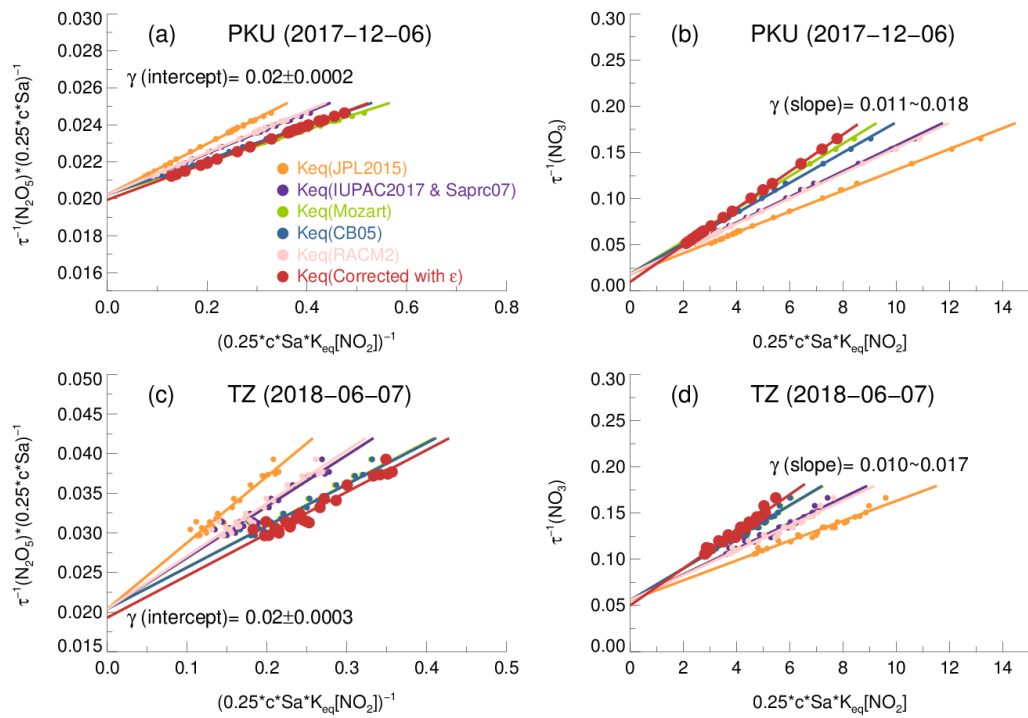

225

226 **Figure S7.** Exemplary fitting plot according to steady state approximation Eq. (1) (a)&(c) and Eq. (2) (b)&(d),  
 227 using  $Keq$  parameterization of JPL2015 (orange), IUPAC2017&Saprc07 (purple), Mozart (green), CB05 (blue)  
 228 and RACM2 (pink). The  $Keq$  (corrected by  $\epsilon$ ) is derived from output of steady state model coupled with RACM2.  
 229 The values of derived  $\gamma(N_2O_5)$  by intercept or slope are shown in text in the figures.

230

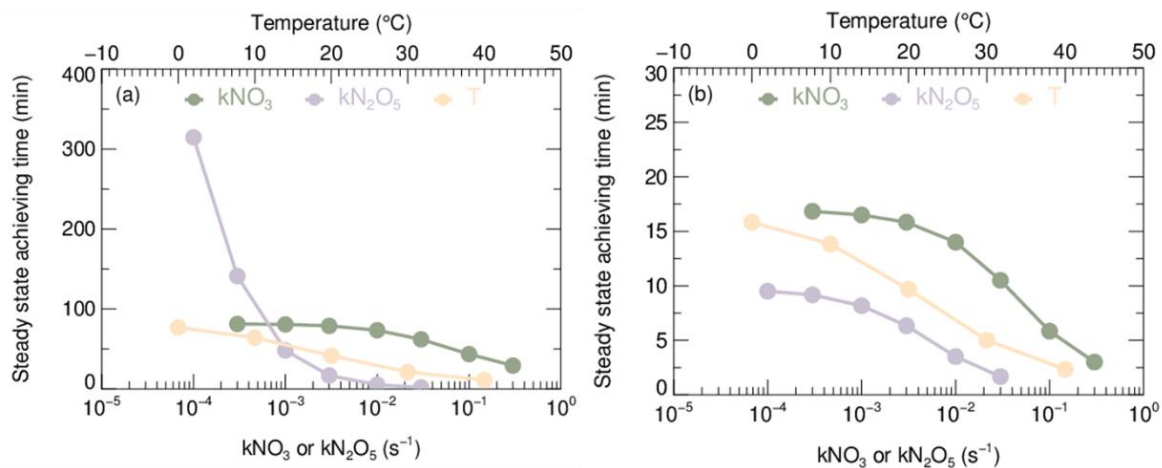

231  
 232 **Figure S8.** Sensitivity plot of  $k\text{NO}_3$ ,  $k\text{N}_2\text{O}_5$  and T against steady state achieving time of  $\text{NO}_3\text{-N}_2\text{O}_5$  system. The  
 233 trace of T is plotted against the upper horizontal axis and the traces of the other two parameters are plotted  
 234 against the lower horizontal axis. (a) Initial model constraint is according to winter condition of PKU2017; (b)  
 235 Initial model constraint is according to summer condition of TZ2018.

236

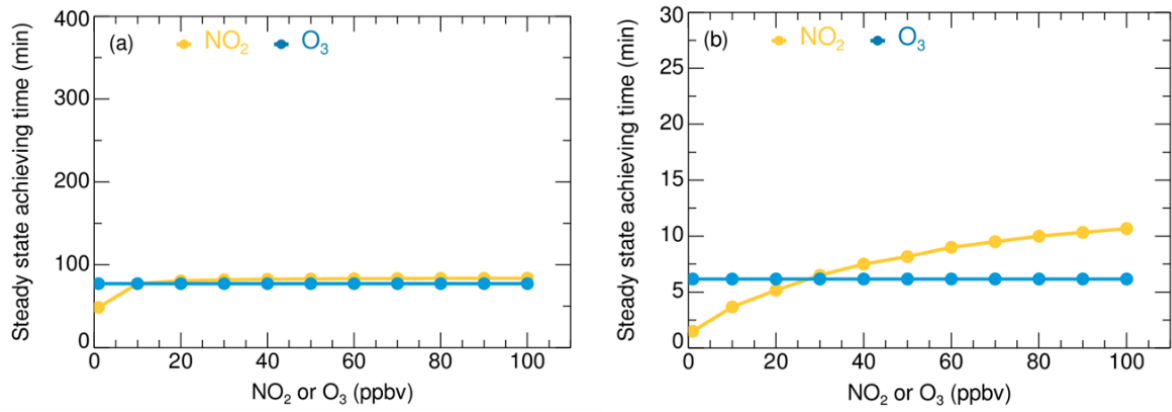

237

238

**Figure S9.** Sensitivity plot of NO<sub>2</sub> and O<sub>3</sub> concentration against steady state achieving time of NO<sub>3</sub>-N<sub>2</sub>O<sub>5</sub> system.

239

(a) Initial model constraint is according to winter condition of PKU2017; (b) Initial model constraint is according

240

to summer condition of TZ2018.

241

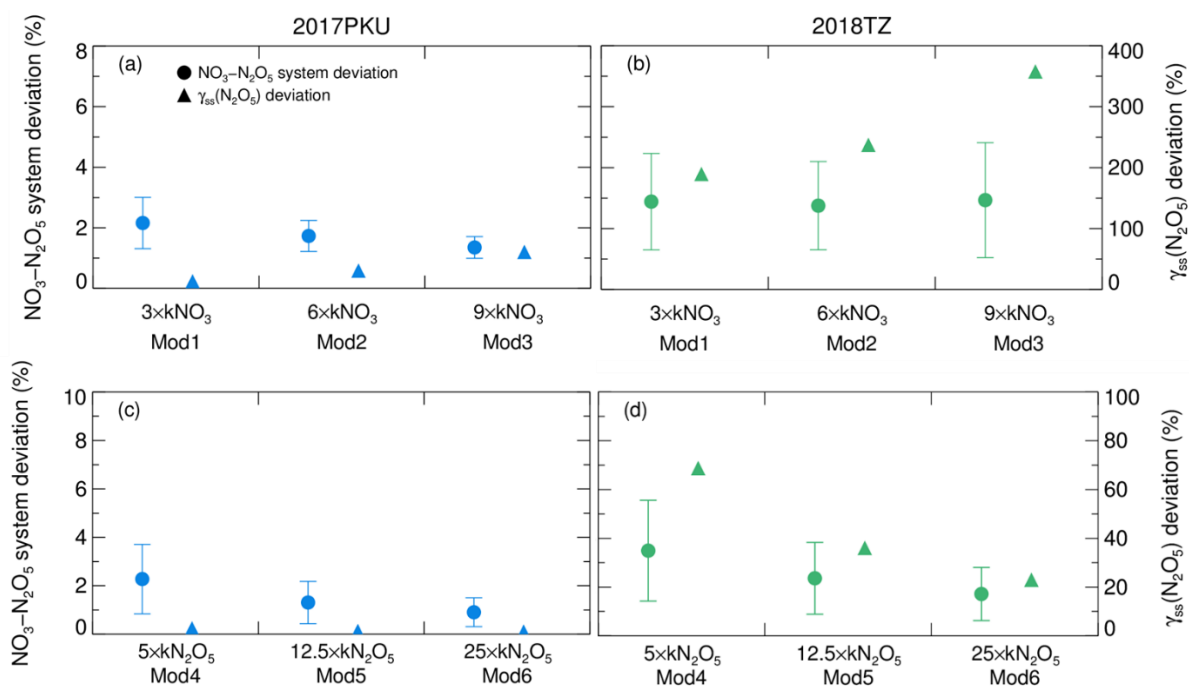

242

243

244

245

246

247

248

249

**Figure S10.** The average of  $\text{NO}_3\text{-N}_2\text{O}_5$  system deviating from steady state and the median value of  $\gamma_{\text{ss}}(\text{N}_2\text{O}_5)$  deviating from true value determined from different model constraints based on (a)&(c) PKU2017 dataset in blue and (b)&(d) TZ2018 dataset in green. The full circles represent the average of  $\text{NO}_3\text{-N}_2\text{O}_5$  system deviating from steady state and the triangles represent the median deviation of  $\gamma_{\text{ss}}(\text{N}_2\text{O}_5)$ . As indicated in the text, the  $k\text{NO}_3$  of Mod1, Mod2 and Mod3 are multiplied by 3,6 and 10 respectively against Mod0, and the  $k\text{N}_2\text{O}_5$  of Mod4, Mod5 and Mod6 are multiplied by 5, 12.5 and 25 respectively against Mod0.

250 **Table S1.** Principal parameters and performance of related instruments.

| Parameter       | Technique                      | Time resolution | Detection Limit(1 $\sigma$ ) | Accuracy   |
|-----------------|--------------------------------|-----------------|------------------------------|------------|
| NO              | Chemiluminescence <sup>a</sup> | 1 min           | 200 pptv                     | $\pm 20\%$ |
| NO <sub>2</sub> | Chemiluminescence              | 1 min           | 300 pptv                     | $\pm 20\%$ |
| O <sub>3</sub>  | UV photometry                  | 1 min           | 500 pptv                     | $\pm 5\%$  |
| VOCs            | GC-MS/FID <sup>b</sup>         | 60 min          | 20-300 pptv                  | $\pm 15\%$ |
| Monoterpene     | PTR-MS <sup>c</sup>            | 10 s            | 20 ppbv                      | $\pm 15\%$ |
| Sa              | Nano SMPS, SMPS, APS           | 5 min           | -                            | $\pm 10\%$ |

251 <sup>a</sup> Photolytic conversion to NO through blue light before detection; <sup>b</sup> Gas chromatography equipped with a mass spectrometer and a flame  
 252 ionization detector; <sup>c</sup> Monoterpene was only measured in TZ2018.

253

254 **Table S2.** Parameters of initial model constraint for sensitivity test.

| Parameters  | NO <sub>2</sub> /ppbv | O <sub>3</sub> /ppbv | T/K | Sa/ $\mu\text{m}^2 \cdot \text{cm}^{-3}$ | $\gamma(\text{N}_2\text{O}_5)^{\text{a}}$ | $k\text{NO}_3/\text{s}^{-1}$ |
|-------------|-----------------------|----------------------|-----|------------------------------------------|-------------------------------------------|------------------------------|
| Winter case | 10                    | 23                   | 276 | 540                                      | 0.02                                      | $9 \times 10^{-3}$           |
| Summer case | 27                    | 49                   | 300 | 2670                                     | 0.02                                      | $9 \times 10^{-2}$           |

255 <sup>a.</sup> With the Sa, T and  $\gamma(\text{N}_2\text{O}_5)$ , the constraint of  $k\text{N}_2\text{O}_5$  can be calculated as  $6 \times 10^{-4} \text{s}^{-1}$  for winter case and  $3 \times 10^{-3} \text{s}^{-1}$  for summer case.

256

257 **Table S3.** Summary of parameters for calculating rate constant of  $k_{R1a}$ .

| Source    | $k_0^{300}$           | n   | $k_\infty^{300}$      | m    | F    | g                                 |
|-----------|-----------------------|-----|-----------------------|------|------|-----------------------------------|
| JPL2015   | $2.4 \times 10^{-30}$ | 3.0 | $1.6 \times 10^{-12}$ | -0.1 | 0.6  | 1.0                               |
| Mozart    | $2.0 \times 10^{-30}$ | 4.4 | $1.4 \times 10^{-12}$ | 0.7  | 0.6  | 1.0                               |
| CB05      | $2.0 \times 10^{-30}$ | 4.4 | $1.4 \times 10^{-12}$ | 0.7  | 0.6  | 1.0                               |
| Saprc07   | $3.6 \times 10^{-30}$ | 4.1 | $1.9 \times 10^{-12}$ | -0.2 | 0.35 | $0.75-1.27 \times \log_{10} 0.35$ |
| RACM2     | $2.0 \times 10^{-30}$ | 4.4 | $1.4 \times 10^{-12}$ | 0.7  | 0.6  | 1.0                               |
| IUPAC2017 | $3.6 \times 10^{-30}$ | 4.1 | $1.9 \times 10^{-12}$ | -0.2 | 0.35 | $0.75-1.27 \times \log_{10} 0.35$ |

258

259



260 **Table S4.** Summary of parameters for calculating rate constant of  $k_{R1b}$ .

| Source                     | $k_0^{300}$                        | n   | $k_\infty^{300}$                        | m    | F    | g                                     | A                     | B <sub>1</sub> | B <sub>2</sub> |
|----------------------------|------------------------------------|-----|-----------------------------------------|------|------|---------------------------------------|-----------------------|----------------|----------------|
| JPL2015 <sup>a</sup>       | $2.4 \times 10^{-30}$              | 3.0 | $1.6 \times 10^{-12}$                   | -0.1 | 0.6  | 1.0                                   | $5.8 \times 10^{-27}$ | 10840          | 10840          |
| Mozart                     | $2.2 \times 10^{-30}$              | 4.4 | $1.4 \times 10^{-12}$                   | 0.7  | 0.6  | 1.0                                   | $3.0 \times 10^{-27}$ | 10900          | 10900          |
| CB05 <sup>b</sup>          | $k_0^{300}/A = 1.0 \times 10^{-3}$ | 3.5 | $k_\infty^{300}/A = 9.7 \times 10^{14}$ | -0.1 | 0.45 | 1.0                                   | -                     | 11000          | 11080          |
| Saprc07 <sup>b</sup>       | $k_0^{300}/A = 1.3 \times 10^{-3}$ | 3.5 | $k_\infty^{300}/A = 9.7 \times 10^{14}$ | -0.1 | 0.35 | 0.75-<br>$1.27 \times \log_{10} 0.35$ | -                     | 11000          | 11080          |
| RACM2                      | $2.2 \times 10^{-30}$              | 4.4 | $1.4 \times 10^{-12}$                   | 0.7  | 0.6  | 1.0                                   | $2.7 \times 10^{-27}$ | 11000          | 11000          |
| IUPAC20<br>17 <sup>b</sup> | $k_0^{300}/A = 1.3 \times 10^{-3}$ | 3.5 | $k_\infty^{300}/A = 9.7 \times 10^{14}$ | -0.1 | 0.35 | 0.75-<br>$1.27 \times \log_{10} 0.35$ | -                     | 11000          | 11080          |

261 a. This rate constant expression is reformed from  $k_{R1a}/K_{eq}$  as defined in JPL2015, where the  $k_{R1a}$  and  $K_{eq}$  are calculated with values  
 262 recommended by JPL2015;

263 b. The  $k_0^{300}/A$  and  $k_\infty^{300}/A$  are given in the form of ratio instead of separately.

264

265 **References:**

- 266 Brown, S. S., Stark, H., and Ravishankara, A. R.: Applicability of the steady state approximation to the  
267 interpretation of atmospheric observations of NO<sub>3</sub> and N<sub>2</sub>O<sub>5</sub>, *J. Geophys. Res.- Atmos.*, 108,  
268 10.1029/2003jd003407, 2003.
- 269 Brown, S. S., Ryerson, T. B., Wollny, A. G., Brock, C. A., Peltier, R., Sullivan, A. P., Weber, R. J., Dube, W. P.,  
270 Trainer, M., Meagher, J. F., Fehsenfeld, F. C., and Ravishankara, A. R.: Variability in nocturnal nitrogen oxide  
271 processing and its role in regional air quality, *Science*, 311, 67-70, 10.1126/science.1120120, 2006.
- 272 Brown, S. S., Dube, W. P., Fuchs, H., Ryerson, T. B., Wollny, A. G., Brock, C. A., Bahreini, R., Middlebrook, A.  
273 M., Neuman, J. A., Atlas, E., Roberts, J. M., Osthoff, H. D., Trainer, M., Fehsenfeld, F. C., and Ravishankara, A.  
274 R.: Reactive uptake coefficients for N<sub>2</sub>O<sub>5</sub> determined from aircraft measurements during the Second Texas Air  
275 Quality Study: Comparison to current model parameterizations, *J. Geophys. Res.- Atmos.*, 114, D00F10(01-16),  
276 Artn D00f10  
277 10.1029/2008jd011679, 2009.
- 278 Cantrell, C., Davidson, J., McDaniel, A., Shetter, R., and Calvert, J.: The equilibrium constant for N<sub>2</sub>O<sub>5</sub> = NO<sub>2</sub>  
279 + NO<sub>3</sub> - Absolute determination by direct measurement from 243 to 397 K, *The Journal of Chemical Physics*,  
280 88, 10.1063/1.454679, 1988.
- 281 Cantrell, C., Shetter, R., Calvert, J., Tyndall, G., and Orlando, J.: Measurement of rate coefficients for the  
282 unimolecular decomposition of N<sub>2</sub>O<sub>5</sub>, *The Journal of Physical Chemistry*, 97, 10.1021/j100138a013, 1993.
- 283 Chang, W. L., Bhave, P. V., Brown, S. S., Riemer, N., Stutz, J., and Dabdub, D.: Heterogeneous Atmospheric  
284 Chemistry, Ambient Measurements, and Model Calculations of N<sub>2</sub>O<sub>5</sub>: A Review, *Aerosol Sci. Technol.*, 45, 665-  
285 695, 10.1080/02786826.2010.551672, 2011.
- 286 Graham, R., and Johnston, H.: The photochemistry of the nitrate radical and the kinetics of the nitrogen  
287 pentoxide-ozone system, *The Journal of Physical Chemistry*, 82, 10.1021/j100492a002, 1978.
- 288 Kircher, C., Margitan, J., and Sander, S.: Pressure and temperature dependence of the reaction nitrogen dioxide  
289 + nitrogen trioxide + M .fwdarw. nitrogen pentoxide (N<sub>2</sub>O<sub>5</sub>) + M, *The Journal of Physical Chemistry*, 88,  
290 10.1021/j150663a037, 1984.
- 291 Ma, X., Tan, Z., Lu, K., Yang, X., Liu, Y., Li, S., Li, X., Chen, S., Novelli, A., Cho, C., Zeng, L., Wahner, A., and  
292 Zhang, Y.: Winter photochemistry in Beijing: Observation and model simulation of OH and HO<sub>2</sub> radicals at an  
293 urban site, *Sci. Total Environ.*, 685, 85-95, <https://doi.org/10.1016/j.scitotenv.2019.05.329>, 2019.
- 294 Morgan, W. T., Ouyang, B., Allan, J. D., Aruffo, E., Di Carlo, P., Kennedy, O. J., Lowe, D., Flynn, M. J.,  
295 Rosenberg, P. D., Williams, P. I., Jones, R., McFiggans, G. B., and Coe, H.: Influence of aerosol chemical  
296 composition on N<sub>2</sub>O<sub>5</sub> uptake: airborne regional measurements in northwestern Europe, *Atmos. Chem. Phys.*, 15,  
297 973-990, 10.5194/acp-15-973-2015, 2015.
- 298 Osthoff, H., Pilling, M., Ravishankara, A. R., and Brown, S.: Temperature Dependence of the NO<sub>3</sub> Absorption  
299 Cross-section Above 298 K and Determination of the Equilibrium Constant for NO<sub>3</sub> + NO<sub>2</sub> ⇌ N<sub>2</sub>O<sub>5</sub> at  
300 Atmospherically Relevant Conditions, *Physical chemistry chemical physics : PCCP*, 9, 5785-5793,  
301 10.1039/B709193A, 2007.
- 302 Pritchard, H.: The nitrogen pentoxide dissociation equilibrium, *Int. J. Chem. Kinet.*, 26, 61-71,  
303 10.1002/kin.550260108, 1994.
- 304 Smith, C., and Ravishankara, A. R.: Kinetics of the reaction nitrogen dioxide + nitrogen trioxide + M at low  
305 pressures and 298 K, *The Journal of Physical Chemistry*, 89, 10.1021/j100254a024, 1985.

306 Wang, H., Chen, X., Lu, K., Tan, Z., Ma, X., Wu, Z., Li, X., Liu, Y., Shang, D., Wu, Y., Zeng, L., Hu, M., Schmitt,  
307 S., Kiendler-Scharr, A., Wahner, A., and Zhang, Y.: Wintertime N<sub>2</sub>O<sub>5</sub> uptake coefficients over the North China  
308 Plain, Science Bulletin, 65, 765-774, <https://doi.org/10.1016/j.scib.2020.02.006>, 2020.  
309
